# Supplementary material for: Methylome analysis for spina bifida shows SOX18 hypomethylation as a risk factor with evidence for a complex (epi)genetic interplay to affect neural tube development
Source: PubMed Central journal article supplement (PMC5064967; doi:10.1186/s13148-016-0272-8), 2016-10-13

Scale  
chr14:

1 Mb | hg19  
53,500,000 | 54,000,000 | 54,500,000 | 55,000,000 |

Chromosome coordinates list

UCSC Genes (RefSeq, GenBank, CCDS, Rfam, tRNAs & Comparative Genomics)

TXNDC16  
TXNDC16  
TXNDC16

PSMC6  
PSMC6  
PSMC6  
GPR137C  
GPR137C  
ERO1L  
PSMC6  
STYX  
STYX  
GNPNAT1

FERMT2  
FERMT2  
FERMT2  
FERMT2  
FERMT2  
DDHD1  
DDHD1  
DDHD1  
DDHD1  
DDHD1

MIR5580  
BMP4  
BMP4  
BMP4  
BMP4

CDKN3  
CDKN3  
CDKN3  
CDKN3  
CNIH  
CNIH  
GMFB  
CGRRF1  
CGRRF1

SAMD4A  
SAMD4A  
SAMD4A  
SAMD4A  
SAMD4A  
SAMD4A  
SAMD4A

GCH1  
GCH1  
GCH1  
GCH1  
GCH1  
GCH1  
GCH1  
U6atac  
MIR4308

RefSeq Genes

RefSeq Genes

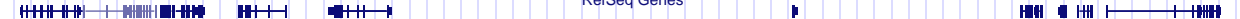

Supplement: 13148_2016_272_MOESM4_ESM.pdf [file 13148_2016_272_MOESM4_ESM.pdf]
